# Supplementary material for: A single unidirectional piRNA cluster similar to the flamenco locus is the major source of EVE-derived transcription and small RNAs in Aedes aegypti mosquitoes
Source: PubMed Central journal article supplement — RNA. 2020 May;26(5):581–94. doi: 10.1261/rna.073965.119 (PMC7161354; doi:10.1261/rna.073965.119), 2020-05
Supplement: supp_073965.119_Supplemental_Table_Legends.pdf [file supp_073965.119_Supplemental_Table_Legends.pdf]

## **SUPPLEMENTAL TABLES**

**Supplemental Table S1. Overview of RNA libraries used in this work.** Table provided as a separate file.

**Supplemental Table S2. Genomic location of EVEs identified in the *A. aegypti* genome (AaegL5).** Table provided as a separate file.

**Supplemental Table S3. Genomic location of EVEs identified in the *A. aegypti* genome (AaegL3).** Table provided as a separate file.

**Supplemental Table S4. Genomic location of piRNA clusters identified in the *A. aegypti* genome (AaegL5).** Table provided as a separate file.

**Supplemental Table S5. Exogenous viruses potentially targeted by EVE-derived piRNAs derived from the *flamenco-like locus*.** Table provided as a separate file.
